# Supplementary material for: Identification of Bacterial Metabolites Modulating Breast Cancer Cell Proliferation and Epithelial-Mesenchymal Transition
Source: MDPI journal article supplement (doi:10.3390/molecules28155898), 2023-08-05
Supplement: s1 [file s1]

POC0000181 positive/negative CTL

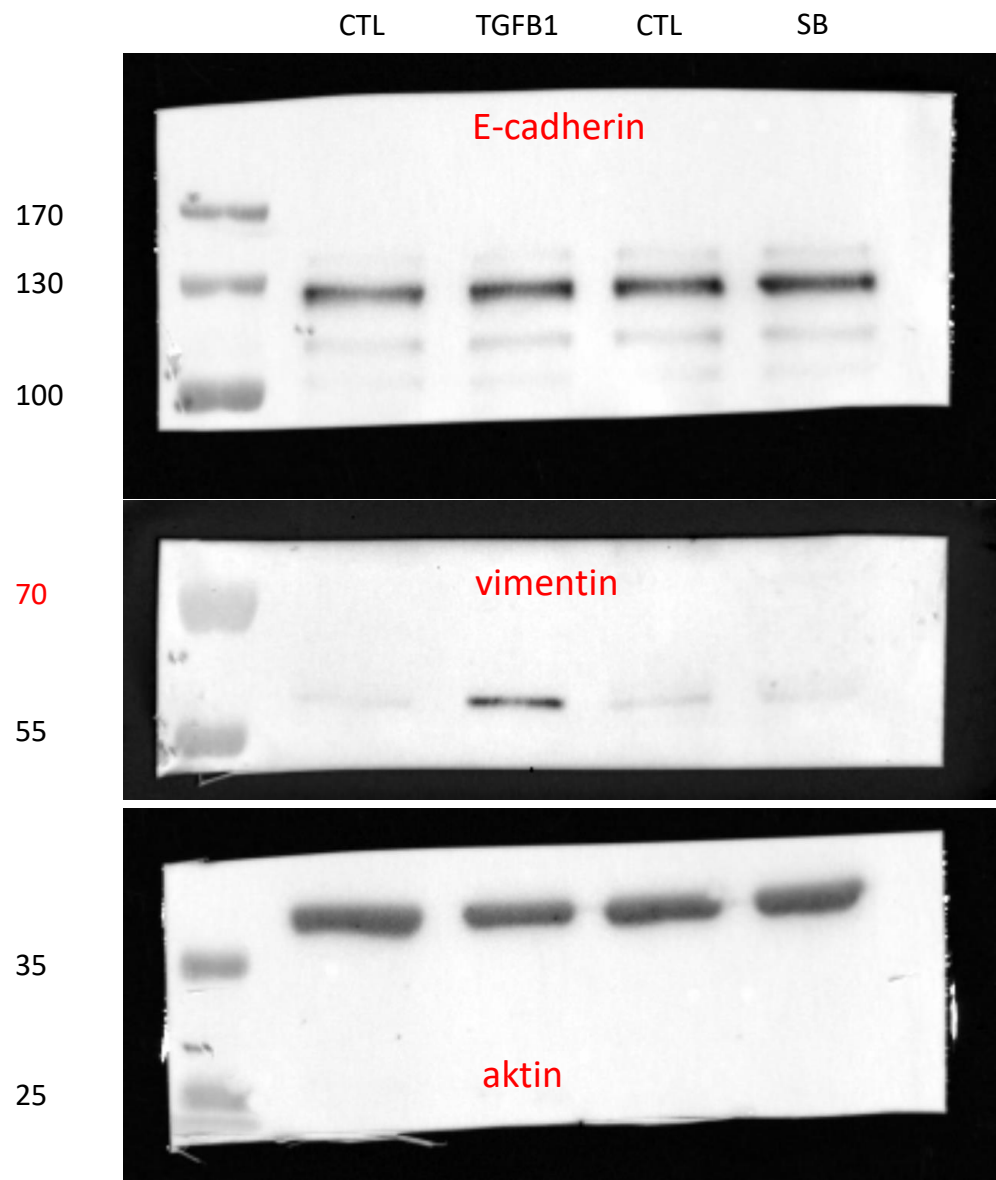

POC0000181 positive/negative CTL

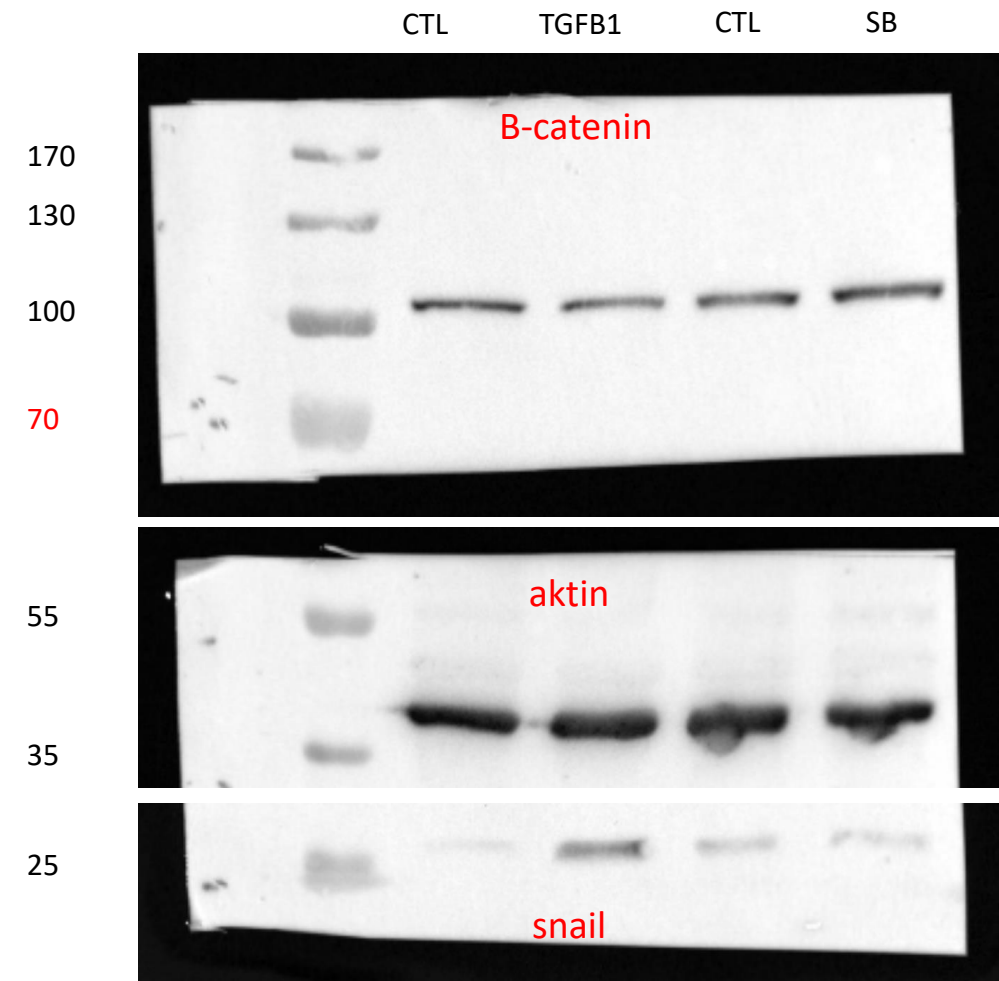

POC0000181

CTL  
2,3-butanediol  
0,56 uM  
CTL  
4-HBA 0,022 uM  
CTL  
Zeaxanthin  
0,22 uM

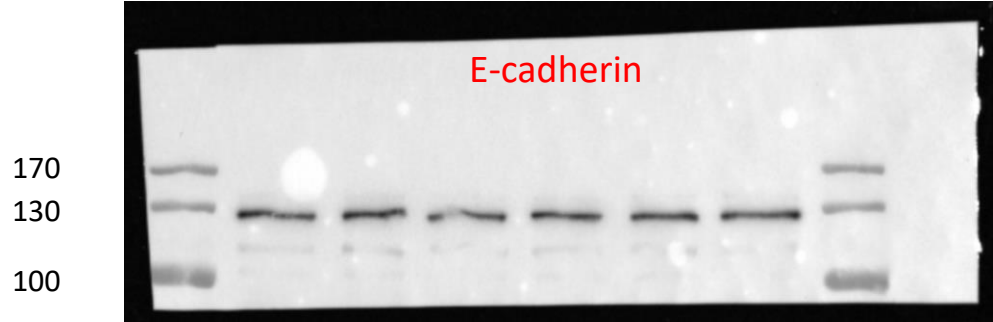

Vimentin - no

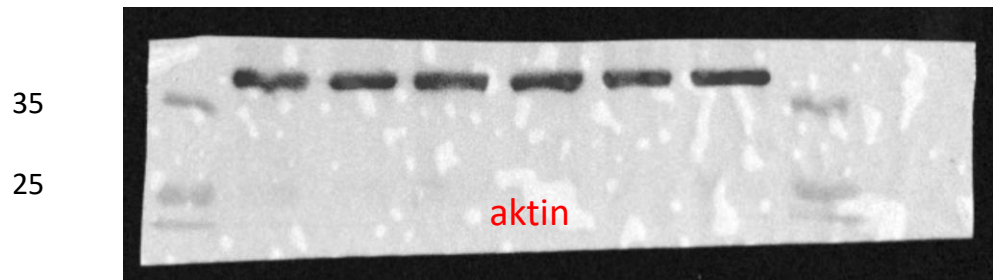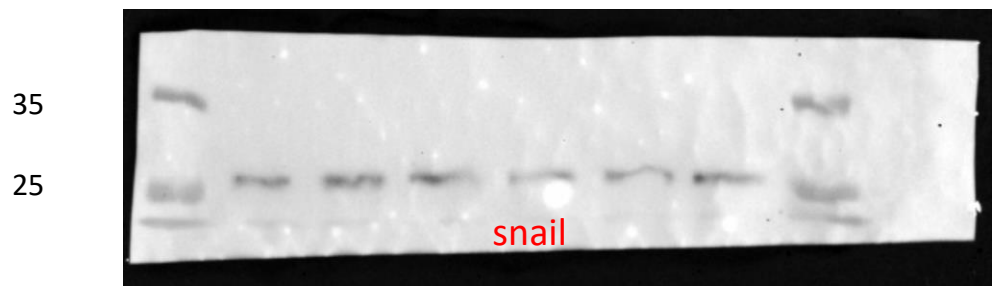

POC0000181

CTL  
3-HPAA 0,121 uM  
CTL  
3-HPAA 0,136 uM  
CTL  
HCA 0,165 uM  
CTL  
HCA 0,213 uM

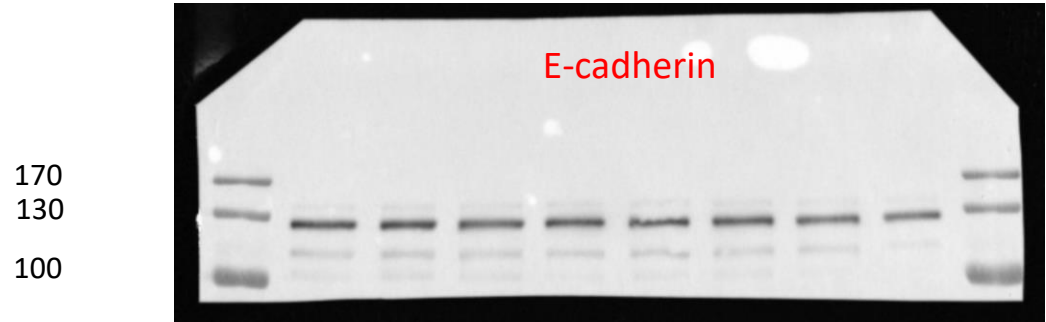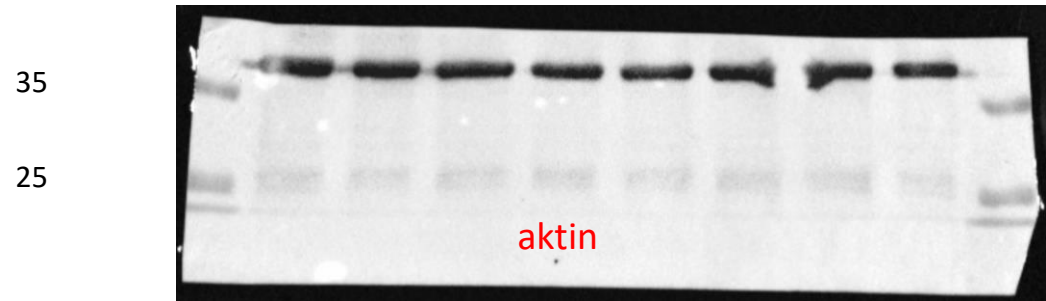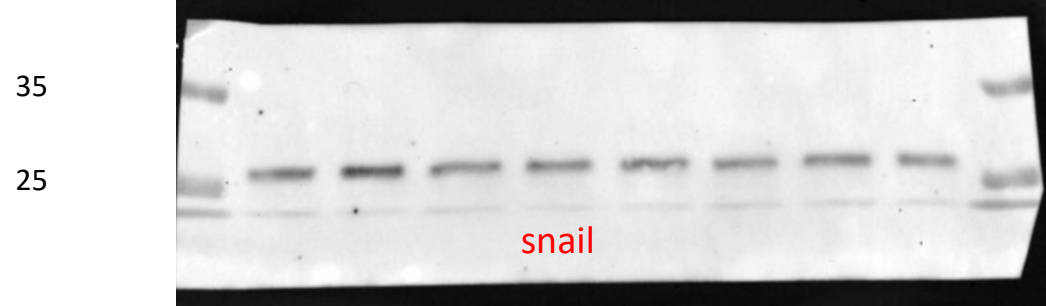

POC0000181

Zeaxanthin  
0,22  $\mu$ M

CTL

4-HBA 0,022  $\mu$ M

CTL

2,3-butanediol  
0,56  $\mu$ M

CTL

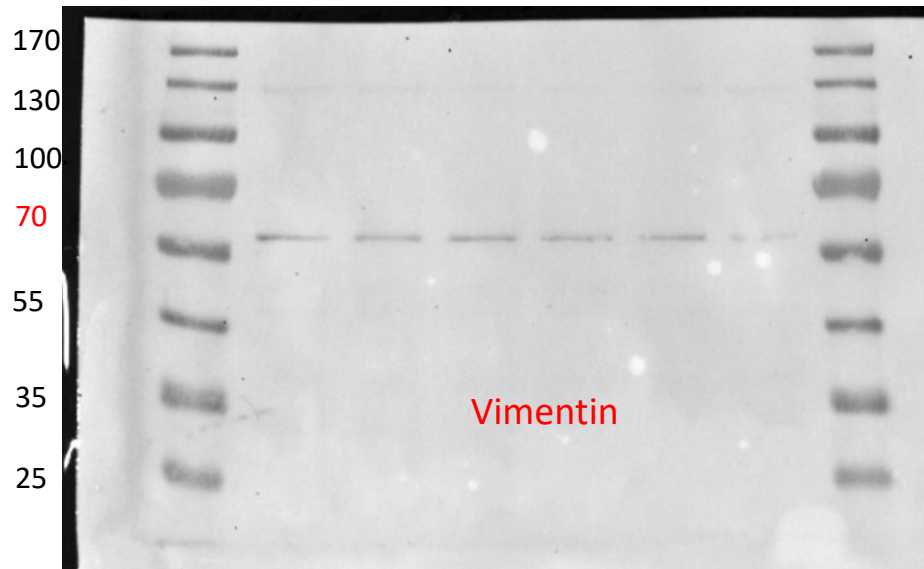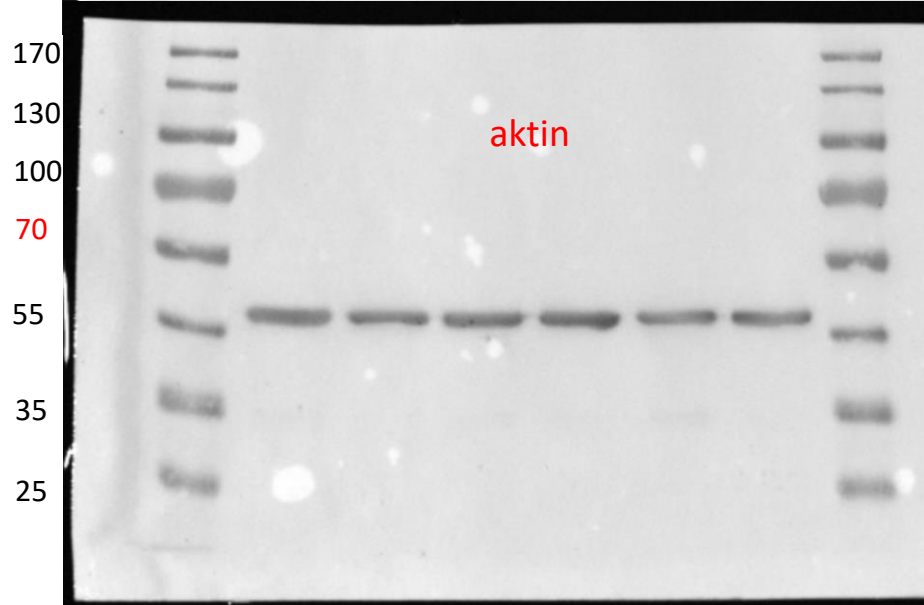

POC0000181

HCA 0,213  $\mu$ M

CTL

HCA 0,165  $\mu$ M

CTL

3-HPAA 0,136  $\mu$ M

CTL

3-HPAA 0,121  $\mu$ M

CTL

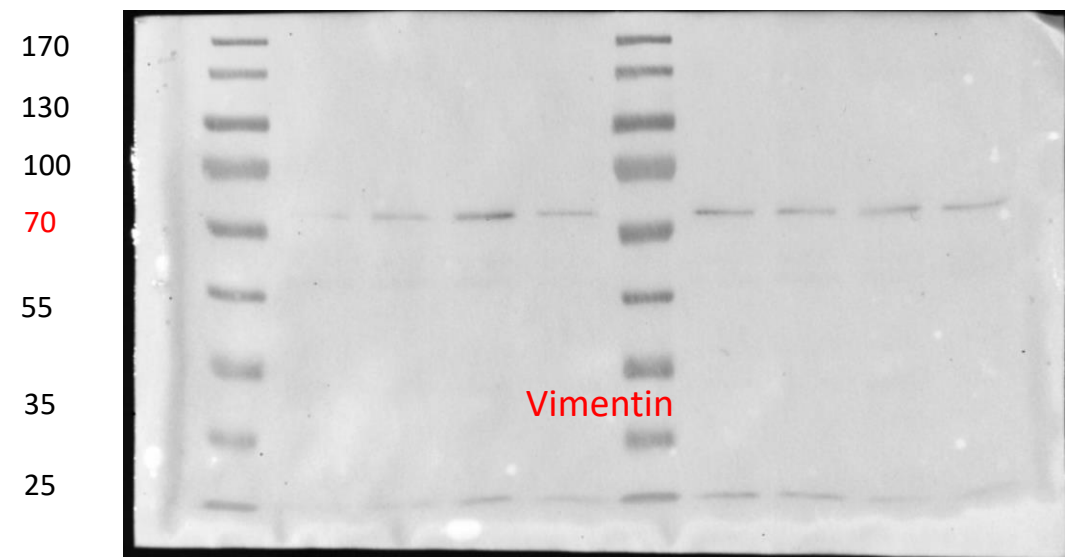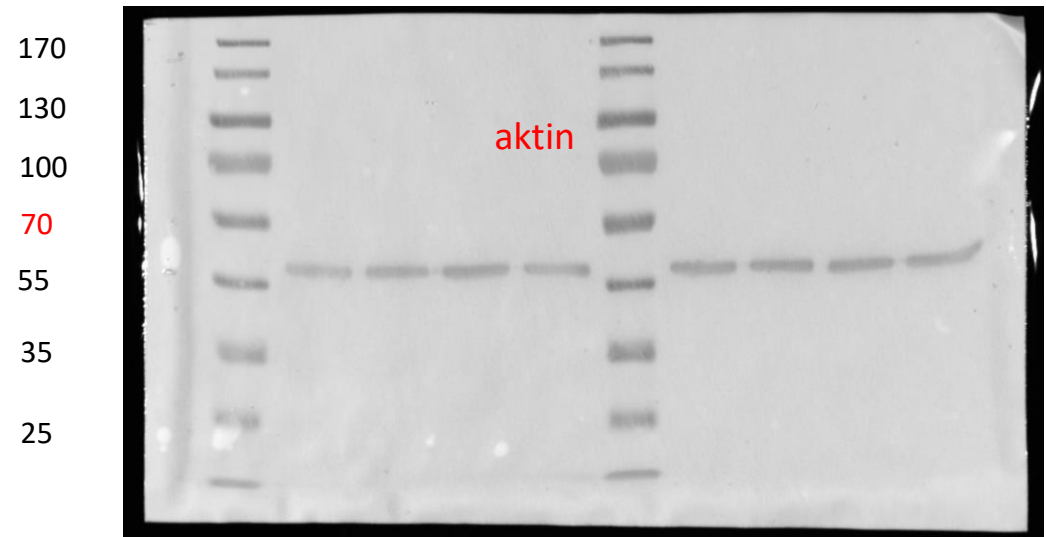

POC0000182 positive/negative CTL

CTL      TGFB1      CTL      SB

E-cadherin

170  
130  
100

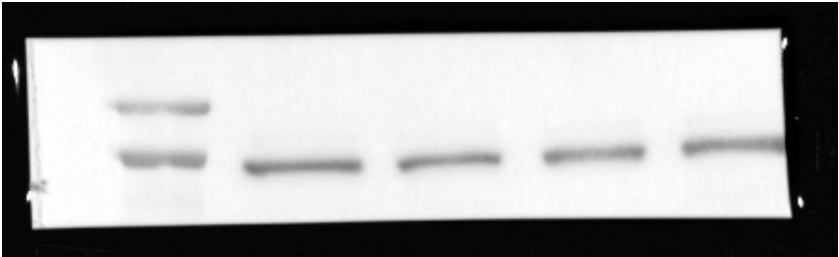

35  
25

aktin

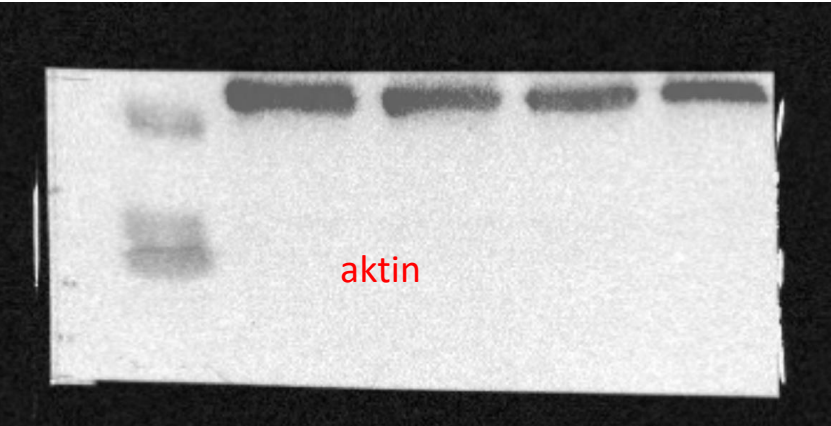

35  
25

snail

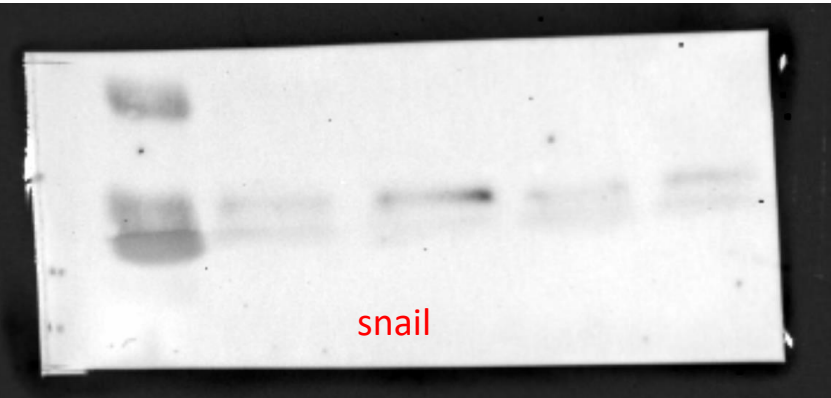

CTL      TGFB1      CTL      SB

vimentin

170  
130  
100  
70  
55  
35  
25

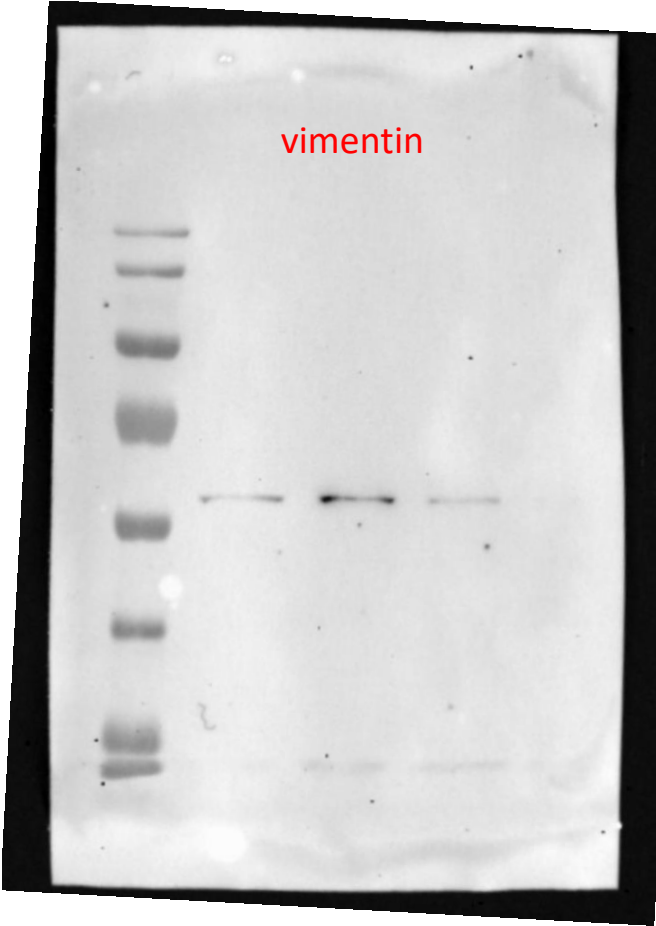

CTL      TGFB1      CTL      SB

aktin

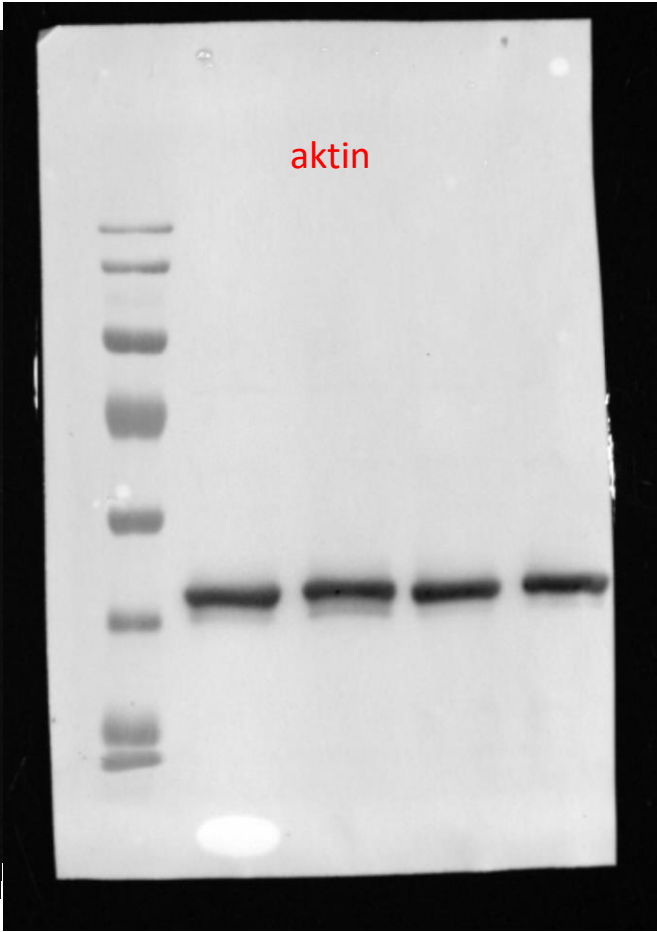

POC0000182

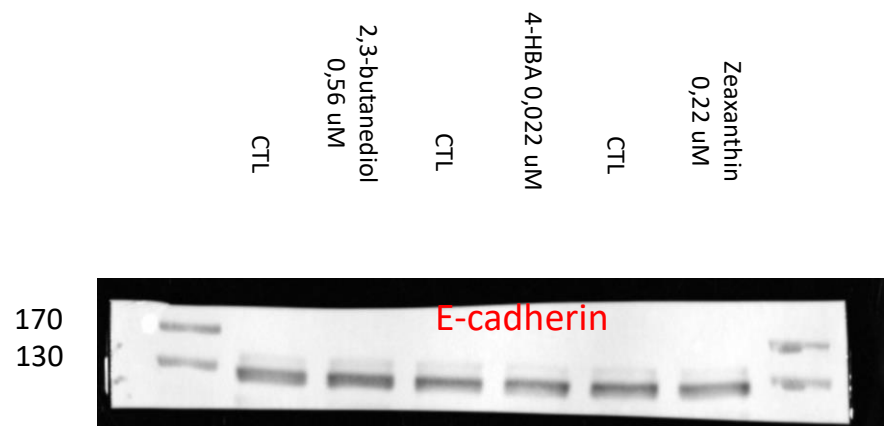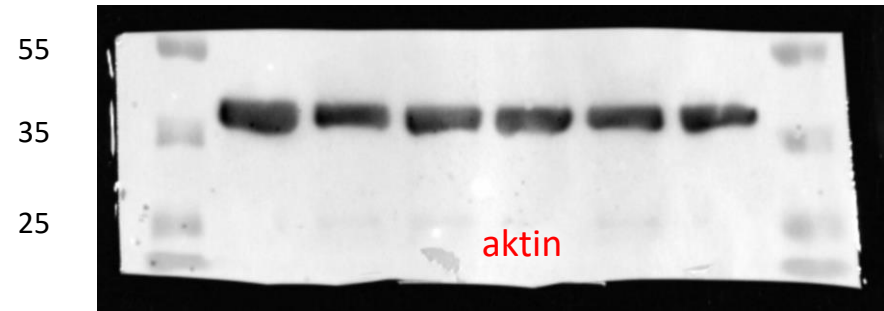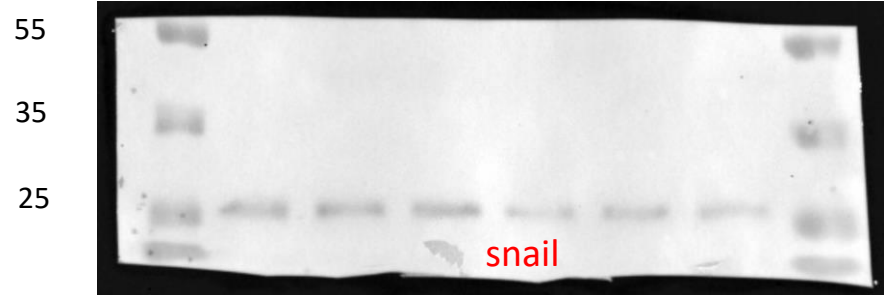

POC0000182

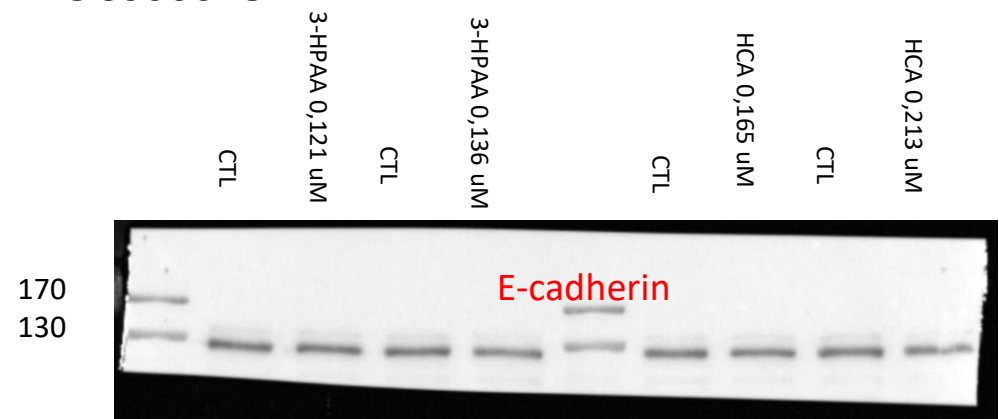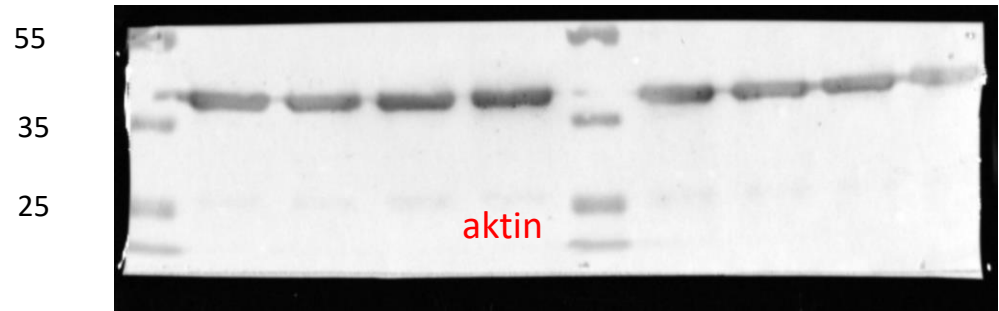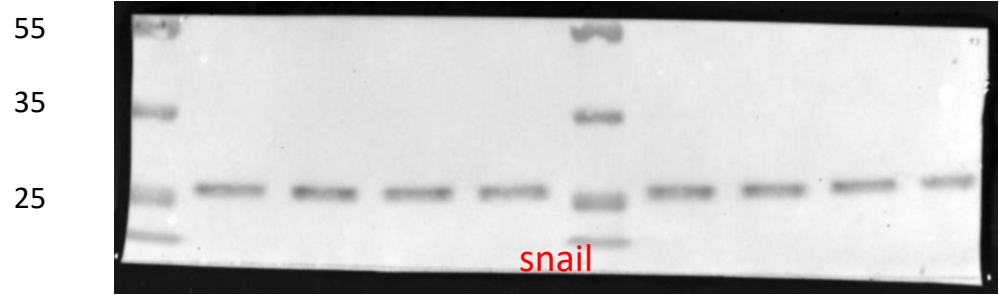



POC0000182

Zeaxanthin  
0,22 uM

CTL

4-HBA 0,022 uM

CTL

2,3-butanediol  
0,56 uM

CTL

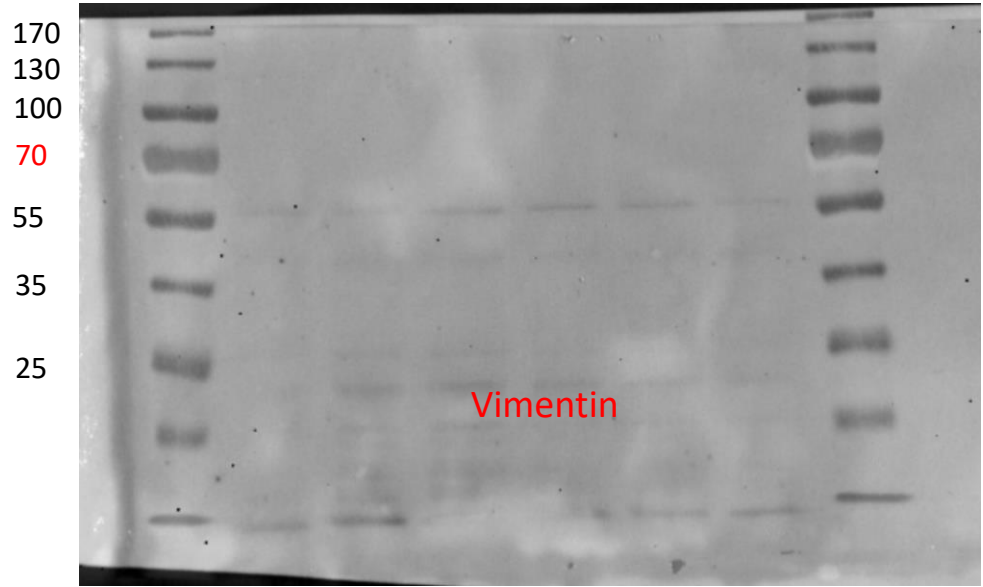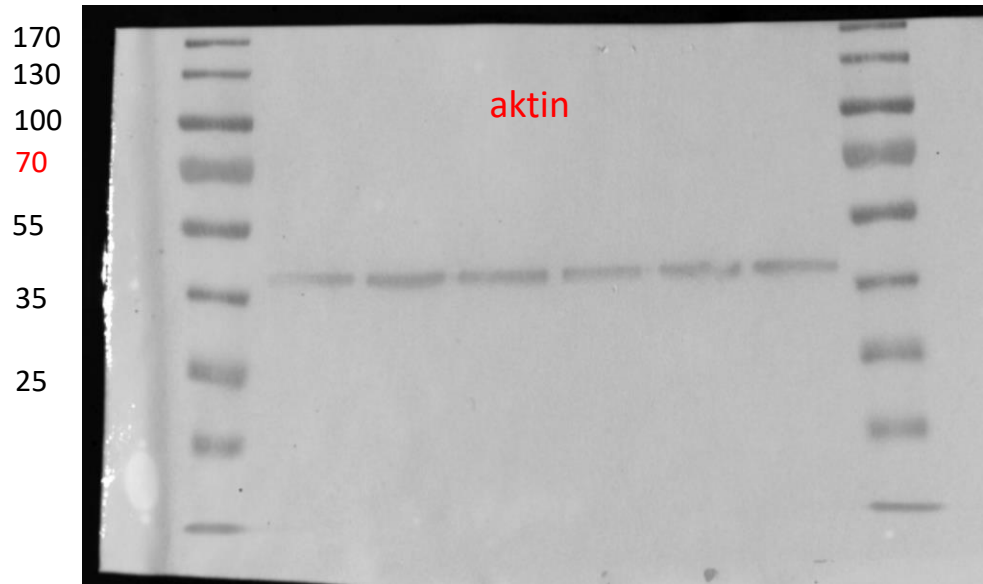

POC0000182

HCA 0,213 uM

CTL

HCA 0,165 uM

CTL

3-HPAA 0,136 uM

CTL

3-HPAA 0,121 uM

CTL

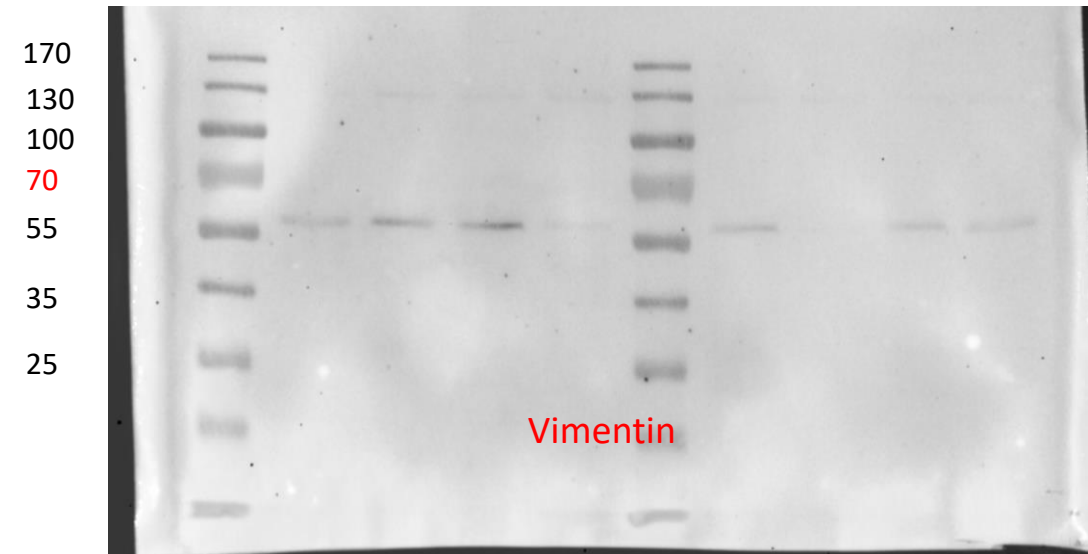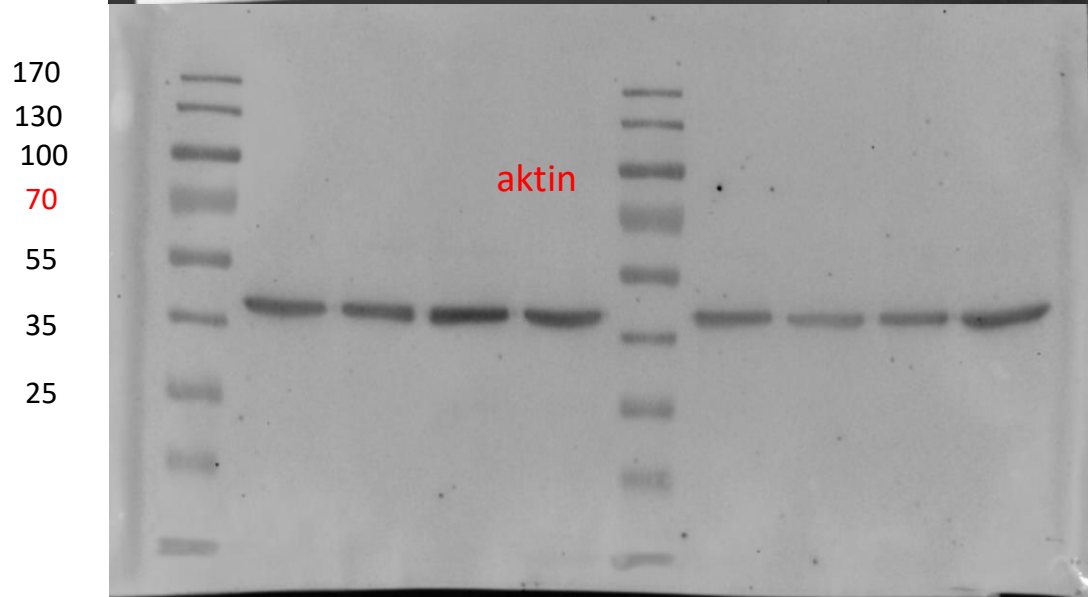

POC0000183 positive/negative CTL

CTL    TGFB1    CTL    SB

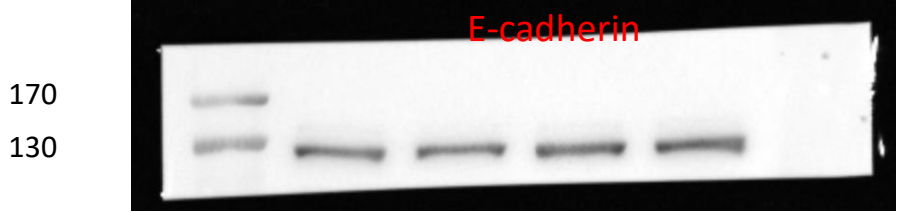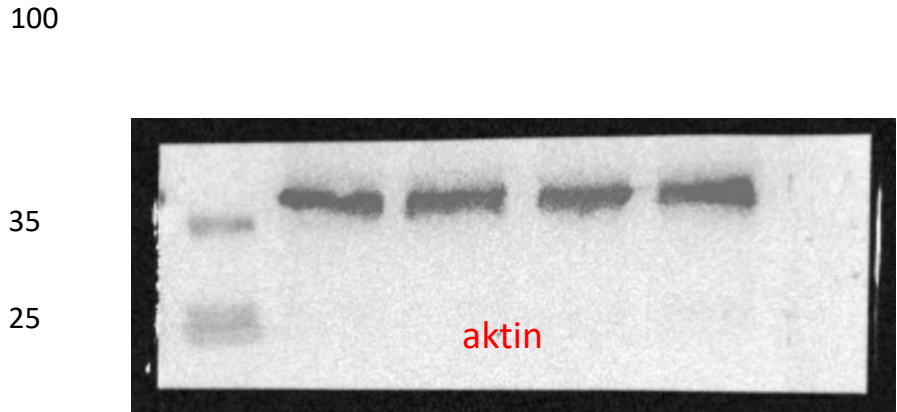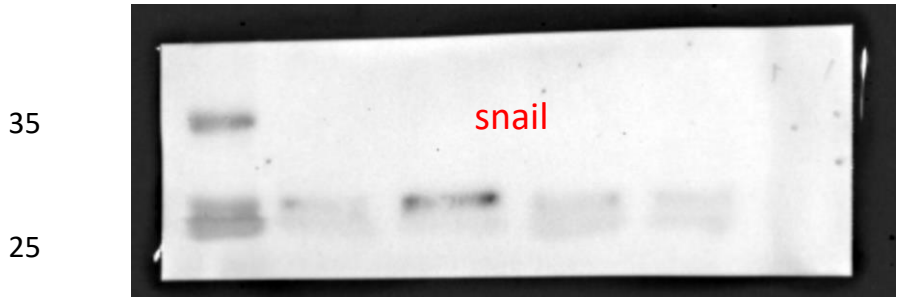

CTL    TGFB1    CTL    SB

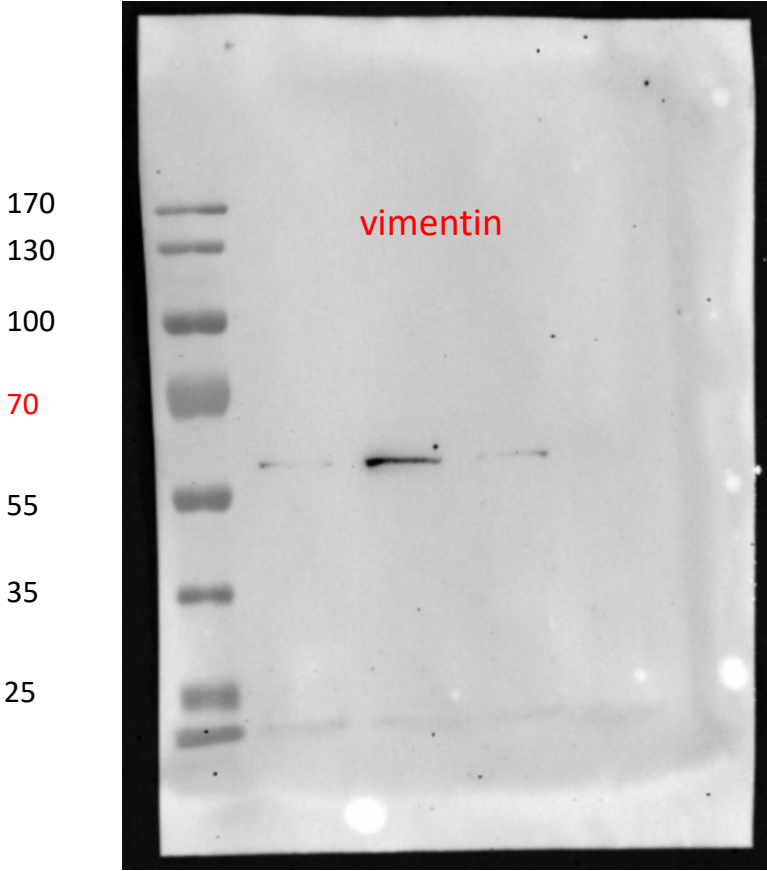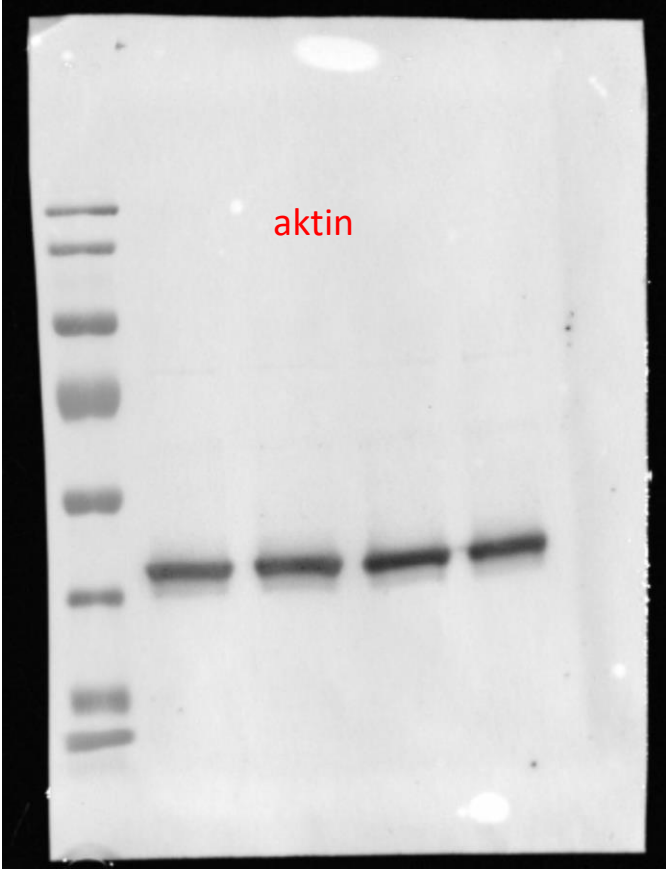

POC0000183 I.

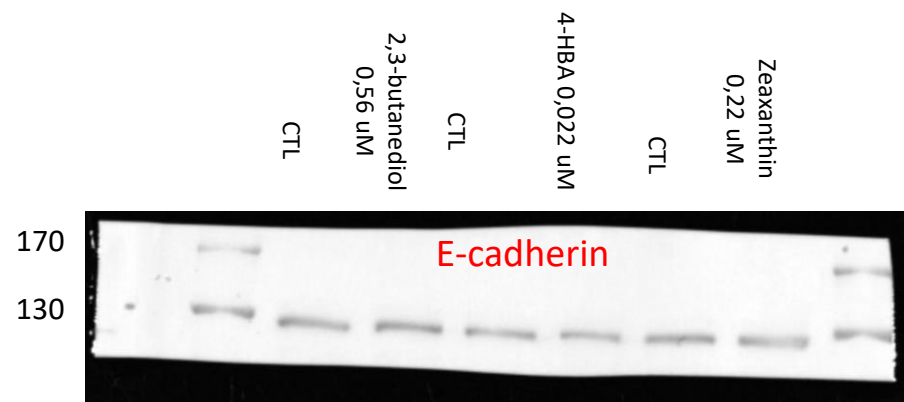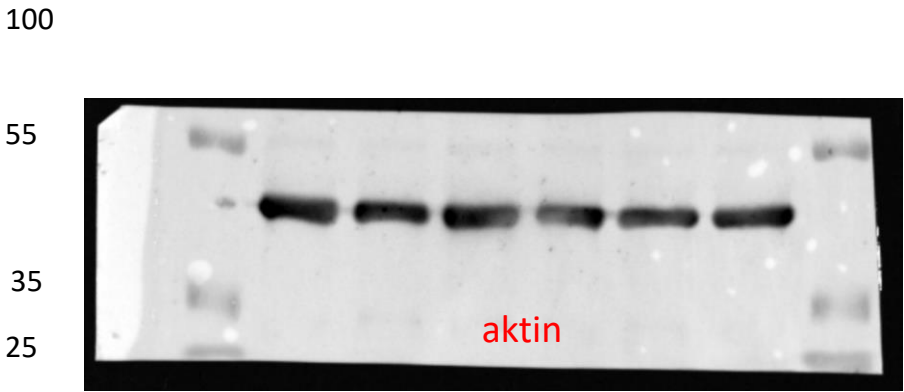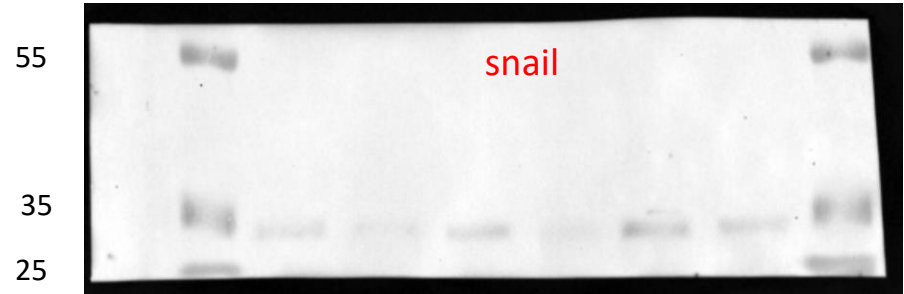

POC0000183 I.

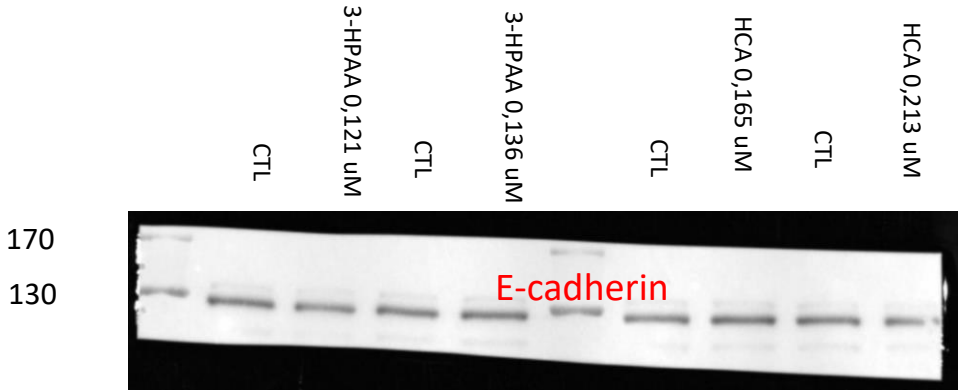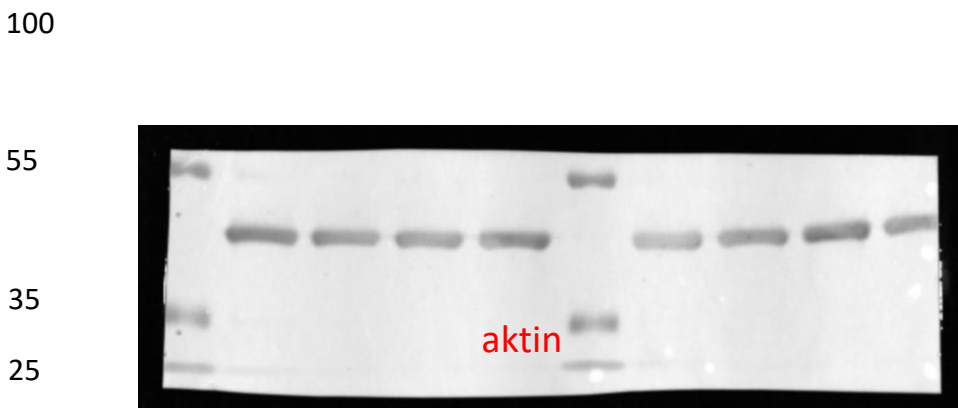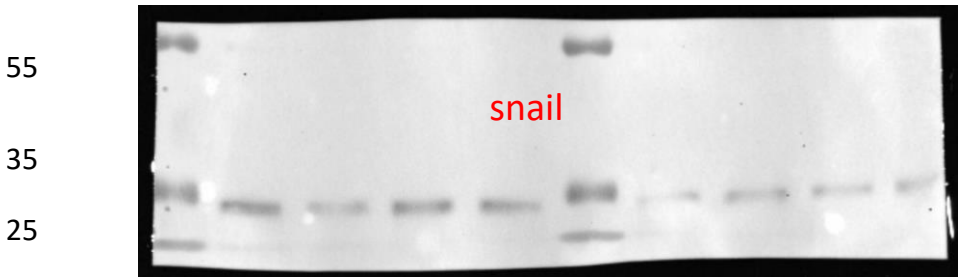



POC0000183 I.

CTL  
2,3-butanediol  
0,56 uM  
CTL  
4-HBA 0,022 uM  
CTL  
Zeaxanthin  
0,22 uM

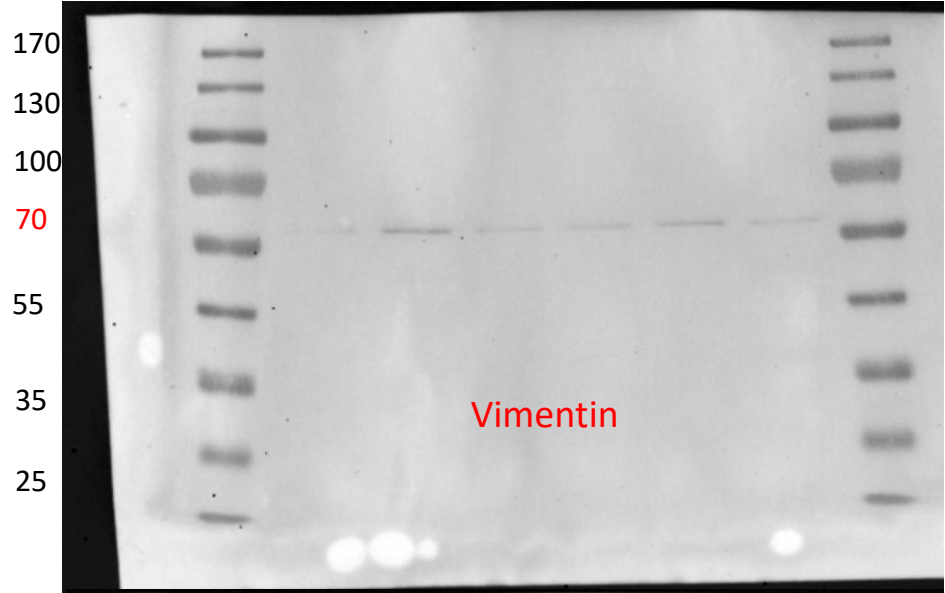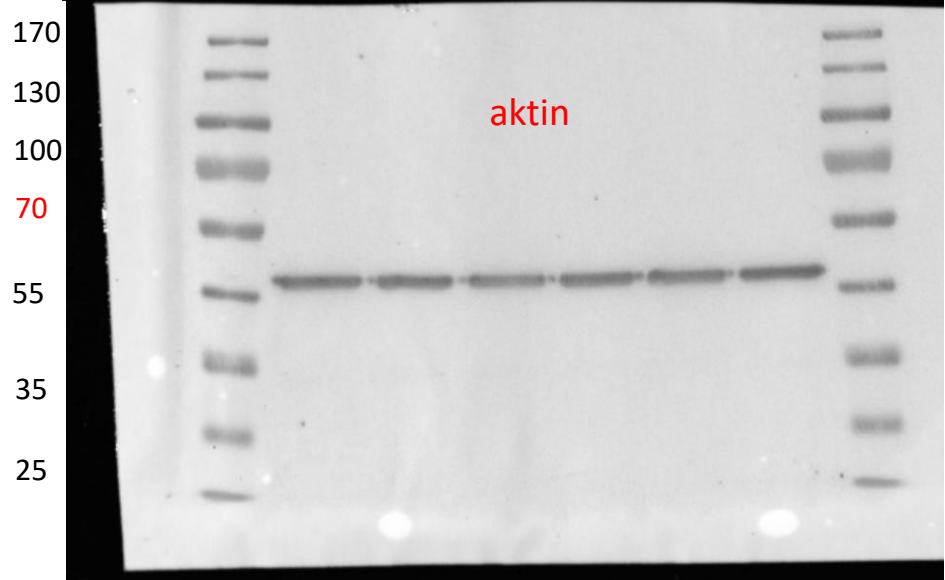

POC0000183 I.

CTL  
3-HPAA 0,121 uM  
CTL  
3-HPAA 0,136 uM  
CTL  
HCA 0,165 uM  
CTL  
HCA 0,213 uM

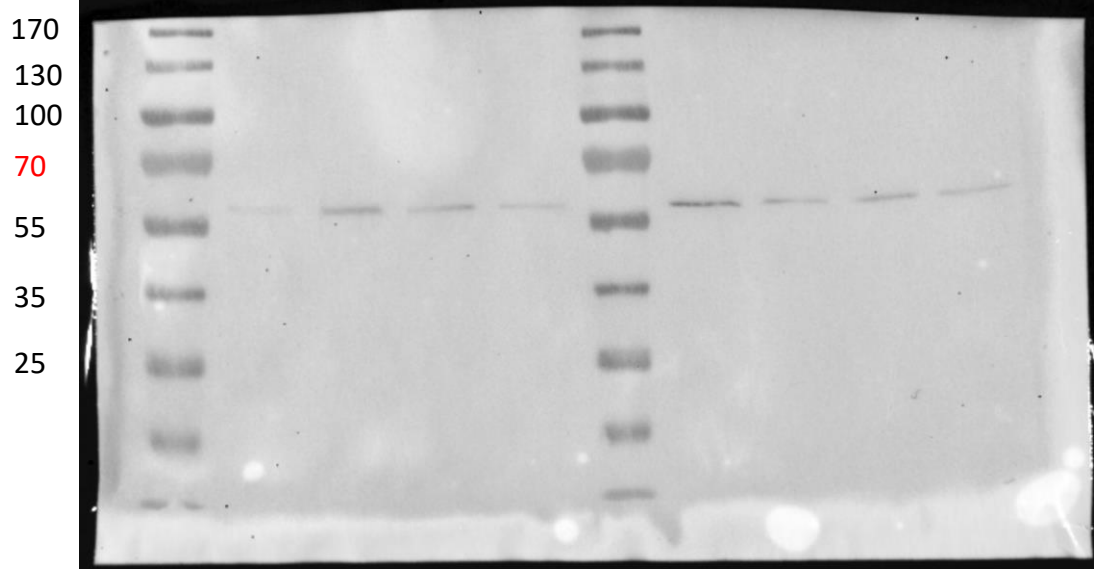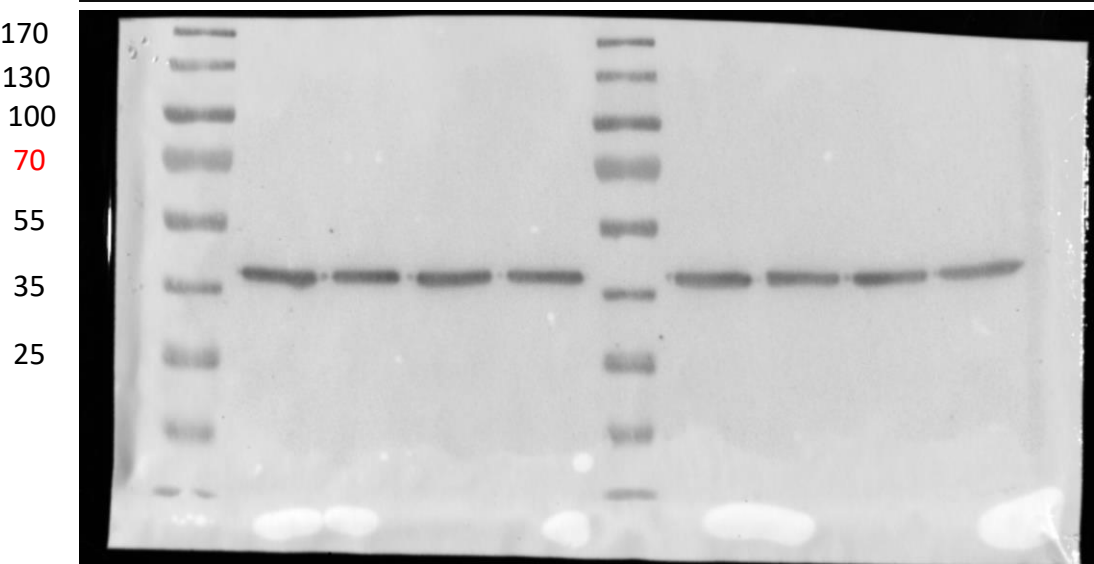

POC0000184 positive/negative CTL

CTL    TGFB1    CTL    SB

170  
130  
100  
70

vimentin

55

55  
35  
25

snail

55  
35  
25

aktin

POC0000185 positive/negative CTL

CTL    TGFB1    CTL    SB

170  
130  
100  
70

vimentin

55  
35  
25

snail

55  
35  
25

aktin

POC0000184

CTL  
2,3-butanediol  
0,56 uM  
CTL  
4-HBA 0,022 uM  
CTL  
Zeaxanthin  
0,22 uM

E-cadherin

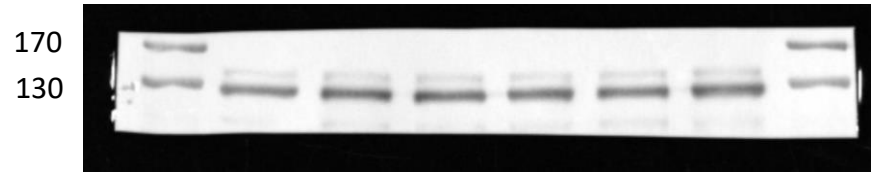

Vimentin – no

100

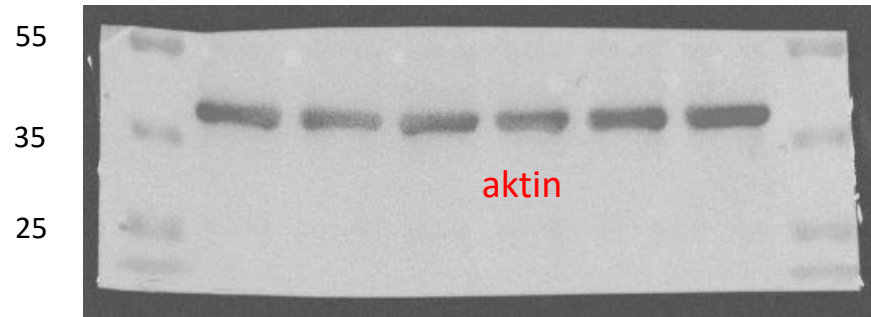

aktin

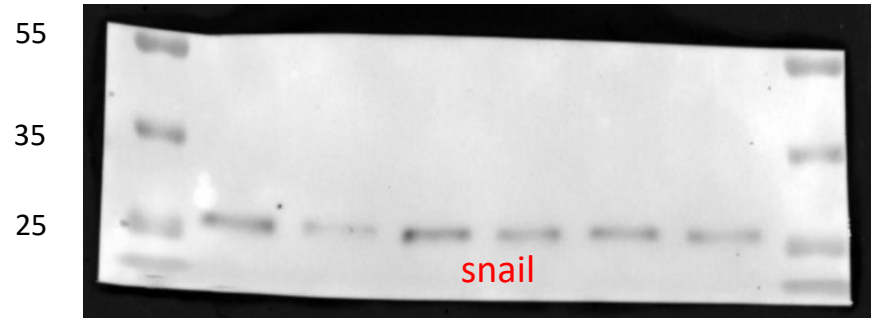

snail

POC0000184

CTL  
3-HPAA 0,121 uM  
CTL  
3-HPAA 0,136 uM  
CTL  
HCA 0,165 uM  
CTL  
HCA 0,213 uM

E-cadherin

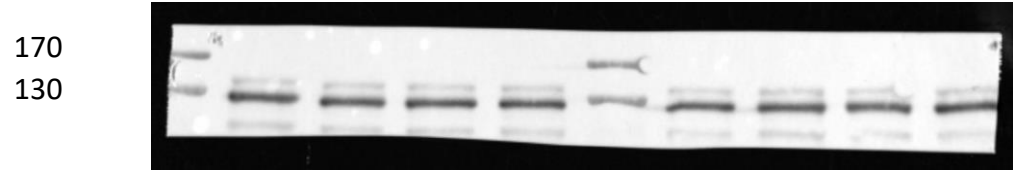

Vimentin - no

100

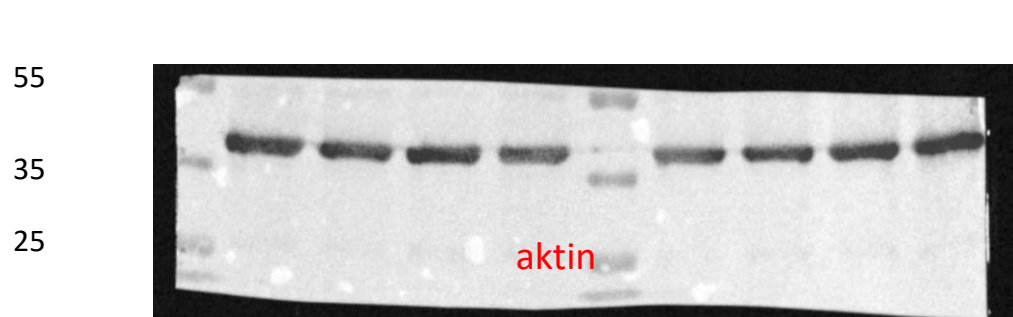

aktin

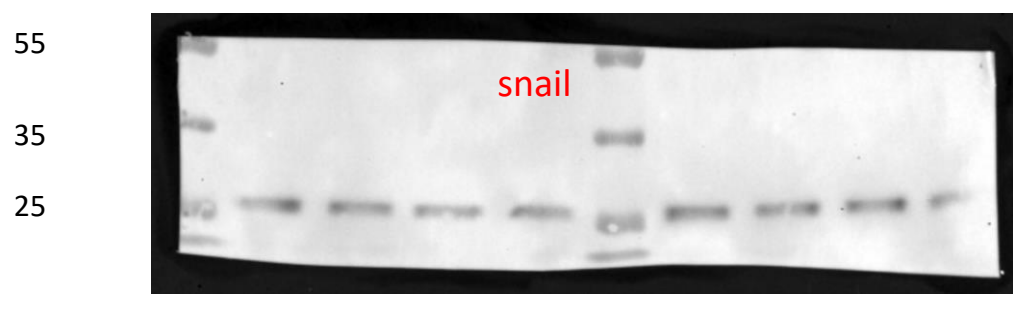

snail

POC0000184

Zeaxanthin  
0,22 uM  
CTL  
4-HBA 0,022 uM  
CTL  
2,3-butanediol  
0,56 uM  
CTL

170  
130  
100  
70  
55  
35  
25

Vimentin

170  
130  
100  
70  
55  
35  
25

aktin

POC0000184

HCA 0,213 uM  
CTL  
HCA 0,165 uM  
CTL  
3-HPAA 0,136 uM  
CTL  
3-HPAA 0,121 uM  
CTL

170  
130  
100  
70  
55  
35  
25

170  
130  
100  
70  
55  
35  
25



POC0000185

Zeaxanthin  
0,22 uM  
CTL  
4-HBA 0,022 uM  
CTL  
2,3-butanediol  
0,56 uM  
CTL

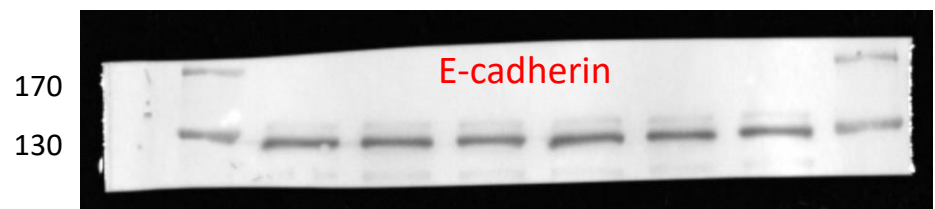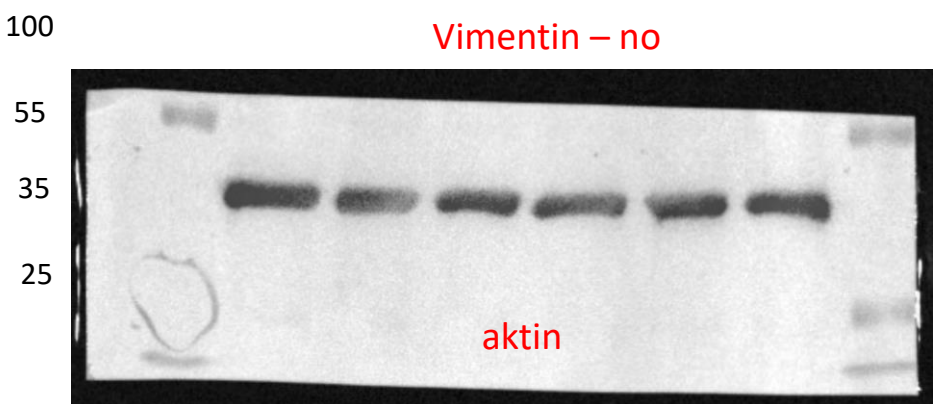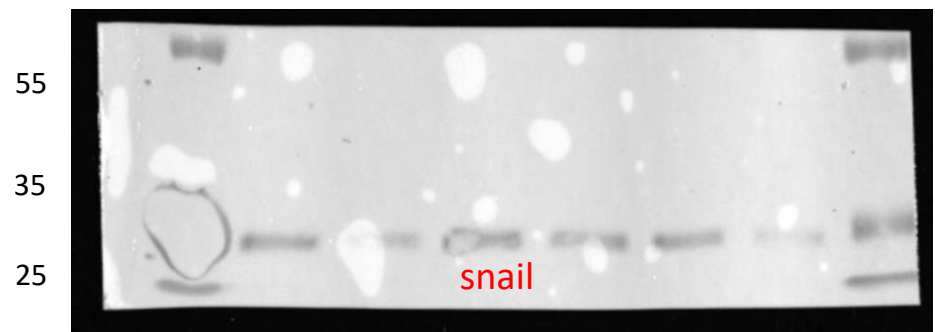

POC0000185

HCA 0,213 uM  
CTL  
HCA 0,165 uM  
CTL  
3-HPAA 0,136 uM  
CTL  
3-HPAA 0,121 uM  
CTL

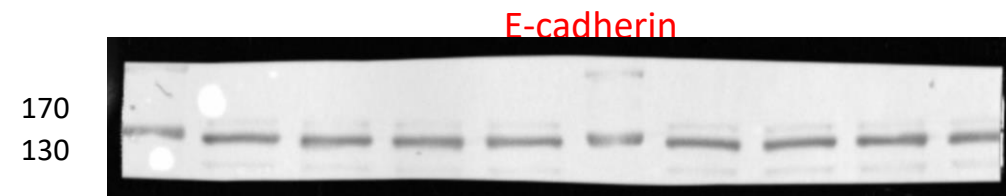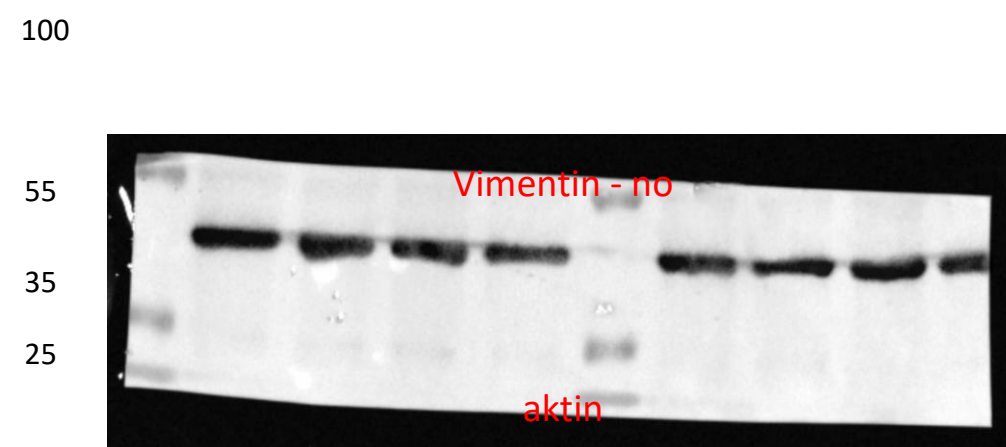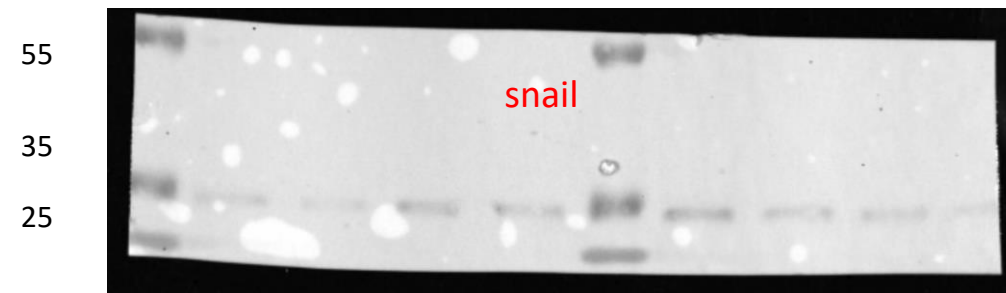



POC0000185

Zeaxanthin  
0,22 uM

CTL

4-HBA 0,022 uM

CTL

2,3-butenediol  
0,56 uM

CTL

170  
130  
100  
70  
55  
35  
25

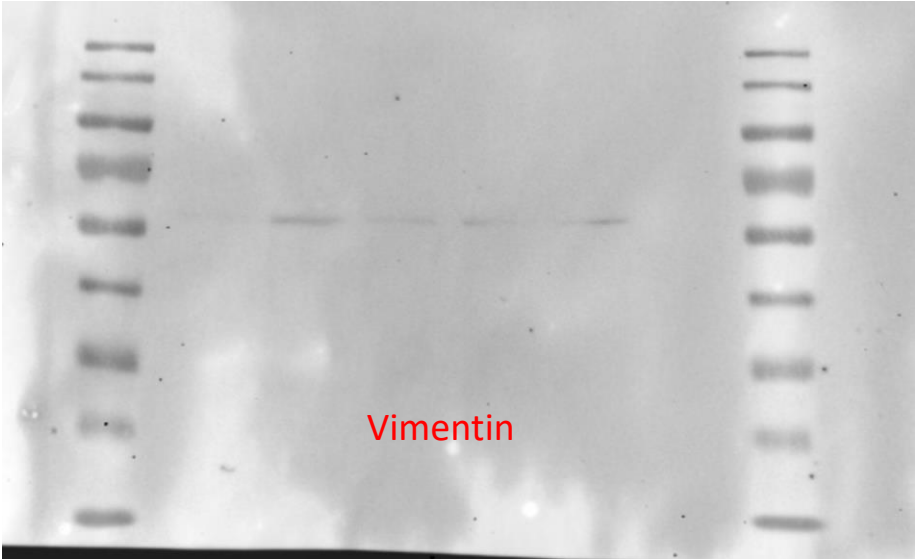

Vimentin

170  
130  
100  
70  
55  
35  
25

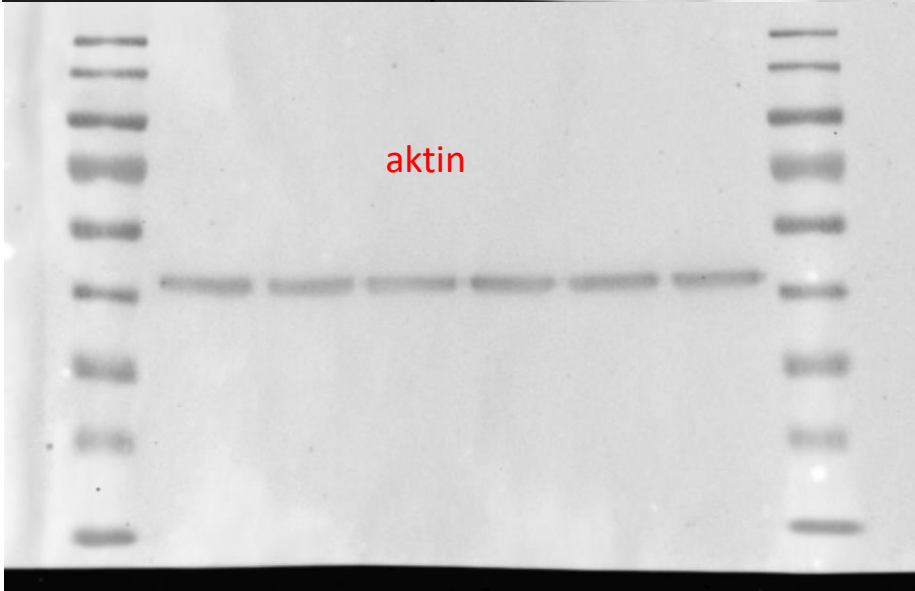

aktin

POC0000185

HCA 0,213 uM

CTL

HCA 0,165 uM

CTL

3-HPAA 0,136 uM

CTL

3-HPAA 0,121 uM

CTL

170  
130  
100  
70  
55  
35  
25

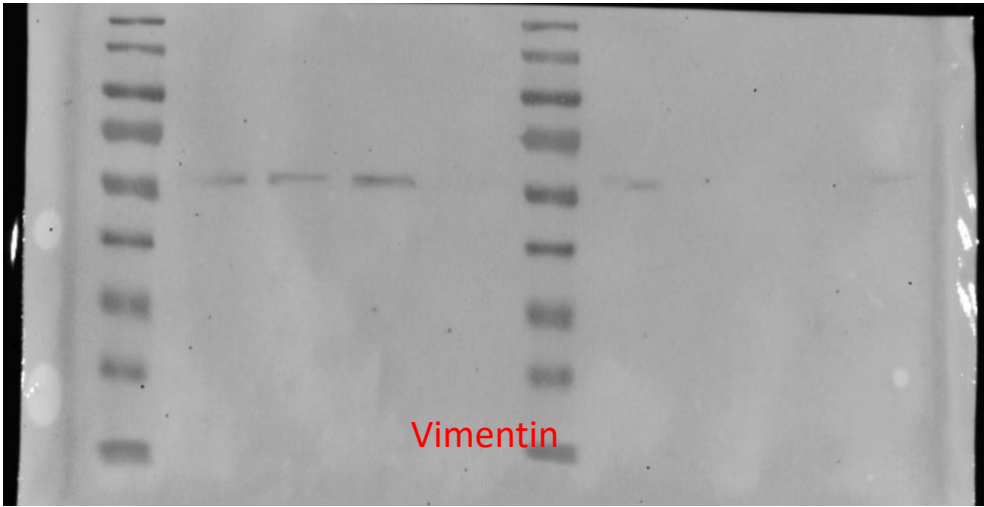

Vimentin

170  
130  
100  
70  
55  
35  
25

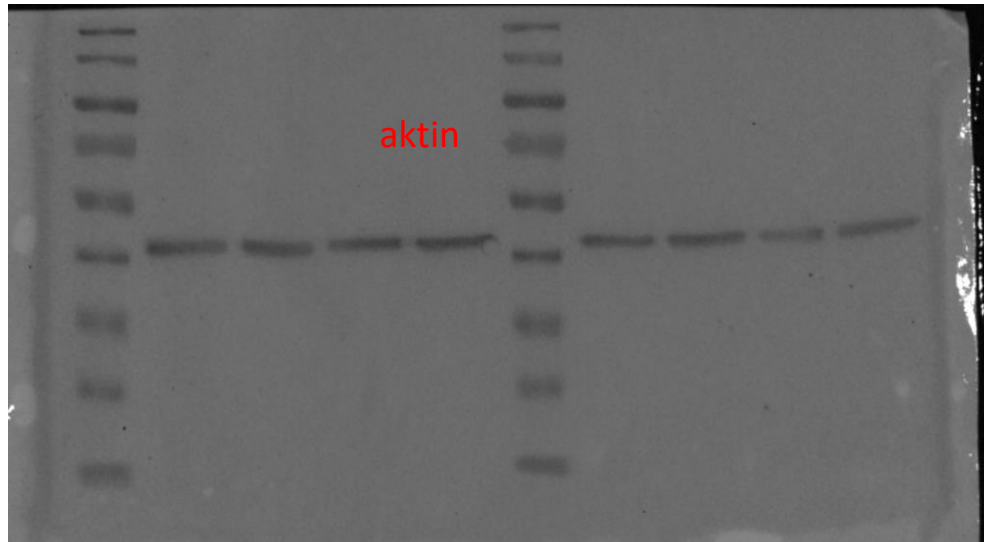

aktin
